# Supplementary material for: Local structure regulation of multiple upconversion emission selectivity in highly doped lanthanide-based core–shell nanocrystals
Source: Royal Society of Chemistry journal article supplement (doi:10.1039/d5tc00657k), 2025-01-01
Supplement: d5tc00657k1.pdf [file d5tc00657k1.pdf]

## **Electronic Supplementary Information (ESI)**

### **Local structure regulation of multiple upconversion emission selectivity in lanthanides highly-doped core-shell nanocrystals**

Yuxuan Qiu<sup>a</sup>, Songbin Liu<sup>a,b\*</sup>, Junjie Wang<sup>a</sup>, Yushuang Peng<sup>a</sup>, Yutian Yu<sup>a</sup>, Hongyuan  
Fei<sup>a</sup>, Fengli Yang<sup>a</sup>, Jiaqing Peng<sup>a</sup>, Junjun Tan<sup>d</sup>, Xinyu Ye<sup>a,c\*</sup>

- a. College of Rare Earth, Jiangxi University of Science and Technology, National Rare Earth Functional Materials Innovation Center (Guoni kechuang Rare Earth Functional Materials (Ganzhou) Co., Ltd), Ganzhou 341000, P.R. China.
- b. Key Laboratory of Ionic Rare Earth Resources and Environment of Ministry of Natural Resources, Ganzhou 341000, P.R. China
- c. Key Laboratory of Testing and Tracing of Rare Earth Products for State Market Regulation, Ganzhou, 341000, P.R. China
- d. Section of Biological Chemistry, Department of Chemistry, University of Copenhagen, Universitetsparken 5, 2100 København Ø, Denmark

E-mail: songbliu@jxust.edu.cn (S. Liu); ye\_xin\_yu@126.com (X. Ye).

## 1. Theoretical analysis of upconversion process

Excitation mechanisms in upconversion systems with multiple electronic excited states are usually complex, including ground state absorption (GSA), energy transfer upconversion (ETU), luminescence, and nonradiative relaxation (NR, including multiphonon relaxation (MPR) and cross-relaxation (CR)). Herein, we assume a simplest possible upconversion mechanism model, which is illustrated in Scheme S1 and can be simplified with six levels system.

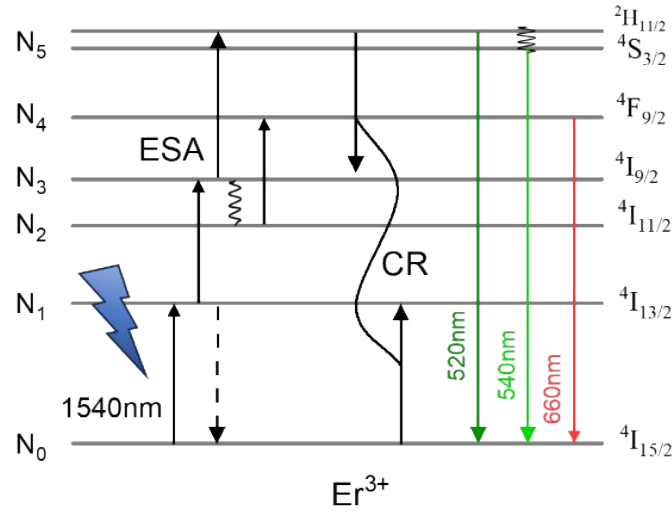

**Scheme S1.** Simplified five levels system in upconversion mechanism of  $\text{Er}^{3+}$  ions.

Among them, N<sub>0</sub>, N<sub>1</sub>, N<sub>2</sub>, N<sub>3</sub>, N<sub>4</sub> and N<sub>5</sub> represent the population densities of  $^4\text{I}_{15/2}$ ,  $^4\text{I}_{13/2}$ ,  $^4\text{I}_{11/2}$ ,  $^4\text{I}_{9/2}$ ,  $^4\text{F}_{9/2}$  and  $^4\text{S}_{3/2}$  states, respectively. The absorption coefficient  $R_i$  is the rate of the GSA and ESA processes, respectively.  $A_i$  represents the non-radiative decay rate of each energy level, and  $C$  represents the cross-relaxation (CR) rate of the transition process:  $^4\text{I}_{15/2} + ^2\text{H}_{11/2} \rightarrow ^4\text{I}_{13/2} + ^4\text{I}_{9/2}$ .  $1/\tau_i$  is related to the radiative decay rate and fluorescence lifetime of each energy level.  $\sigma\Phi$  represents the pumping rate,  $\sigma$  is the absorption cross section, and  $\Phi$  is the excitation photon flux.

$$\frac{dN_1}{dt} = R_1N_0 - A_1N_1 + CN_0 = 0$$

$$\frac{dN_3}{dt} = R_3N_1 - A_3N_3 + CN_5 = 0$$

$$\frac{dN_5}{dt} = R_5N_3 - A_5N_5 - CN_5 = 0$$

$$N = N_0 + N_1 + N_2 + N_3 + N_4 + N_5$$

$$R_i = \sigma\Phi$$

$$A_i = \frac{1}{\tau_i}$$

- 1) The ground-state population density  $N_0$  is assumed to be constant.
- 2) Since the excitation conditions are the same for the series of samples, the absorption coefficient  $R_i$  is related to the absorption cross section, Planck constant, and incident pump power, so it also can be regarded as constant.
- 3) Since the activator and sensitizer in this  $\text{LiErF}_4@\text{LiYF}_4$  systems are  $\text{Er}^{3+}$  ion and the concentration is consistent, so cross relaxation rate  $C$  of each sample is also kept the same.

Simplify the constants and the same part of the above formula, thus,

$$\text{Upconversion green emitting level: } A_G = A_5 \propto \frac{1}{\tau_5} = \frac{1}{\tau_G}$$

Similarly:

$$\text{Upconversion red emitting level: } A_R = A_4 \propto \frac{1}{\tau_4} = \frac{1}{\tau_R}$$

In order to quantitatively analyze the influence of energy transition rate and non-radiative transition rate in series of samples, the following formulas are used:

$$\frac{1}{\tau_G} = A_{i-G} + A_{r-G}$$

$$\frac{1}{\tau_{i-G}} = A_{i-G}$$

$$\frac{1}{\tau_R} = A_{i-R} + A_{r-R}$$

$$\frac{1}{\tau_{i-R}} = A_{i-R}$$

Here  $\tau_G$ ,  $\tau_{i-G}$ ,  $A_{i-G}$ ,  $A_{R-G}$  is the total lifetime, intrinsic lifetime, spontaneous emission decay rate, and the non-radiative transition decay rate of green upconversion luminescence, respectively. While  $\tau_R$ ,  $\tau_{i-R}$ ,  $A_{i-R}$ ,  $A_{r-R}$  is the total lifetime, intrinsic lifetime, spontaneous emission decay rate, and the non-radiative transition decay rate of red upconversion luminescence, respectively. Therefore, we measured the intrinsic lifetime of green and red upconversion emitting level for series of samples monitored at 554 nm and 669 nm, the non-radiative transition rate was calculated by the above formulas. And the calculated results were shown in Figure. S3, Table S1 and Table S2.

We found that the non-radiative transition rate was calculated by the above formula. We found that the non-radiative transition rates of green and red light gradually decreased with the increase of  $\text{CF}_3\text{COOLi}$  amount. The calculated value of the non-radiative transition rate of the green light ( $A_{i-G}$ ) is reduced from 5.80 to  $4.59 \times 10^3 \text{ s}^{-1}$ , while the red light ( $A_{i-R}$ ) is reduced from 7.07 to  $3.50 \times 10^3 \text{ s}^{-1}$  for CS1 to CS5 sample, respectively. These results indicate that as the amount of  $\text{CF}_3\text{COOLi}$  increases, the  $\text{F}^-$  vacancy gradually decreases, and the probability of non-radiative transition gradually decreases. In turn, it affects the entire energy transition process and enhances the upconversion emission intensity. The  $\text{F}^-$  vacancy-related non-radiative transition

competes with the radiative transition, and the non-radiative transition corresponding to the red light is more suppressed than the green light, resulting in a change in the upconversion emission selectivity to exhibit multicolor upconversion characteristic.

## 2. Figures S1-S5

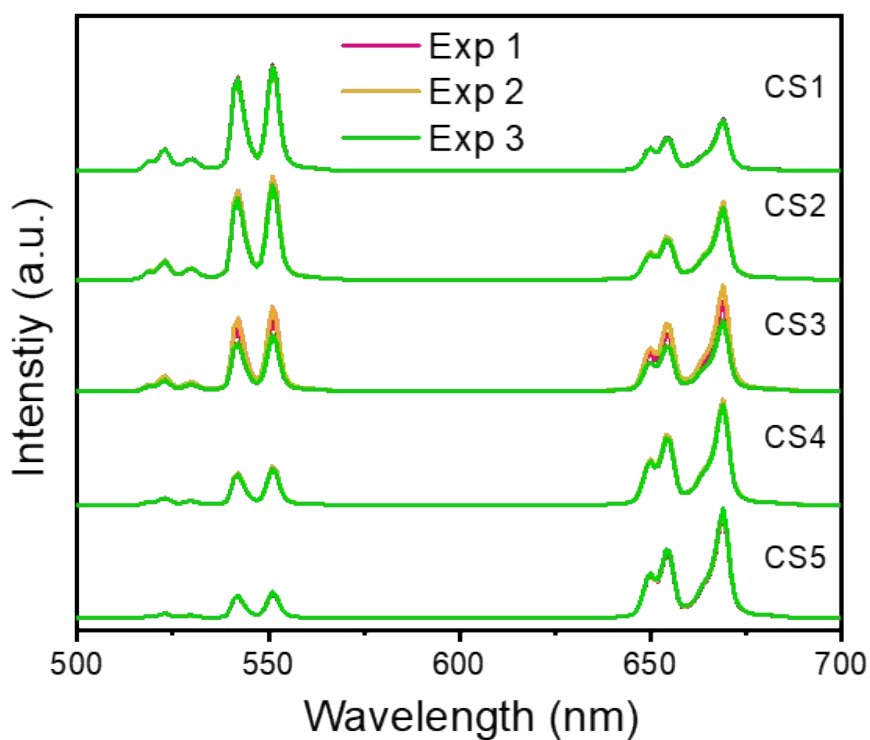

**Fig. S1** Upconversion emission spectra of CS1 ~ CS5 samples with repeated same synthesis experimental procedure (Exp 1 ~ Exp 3)

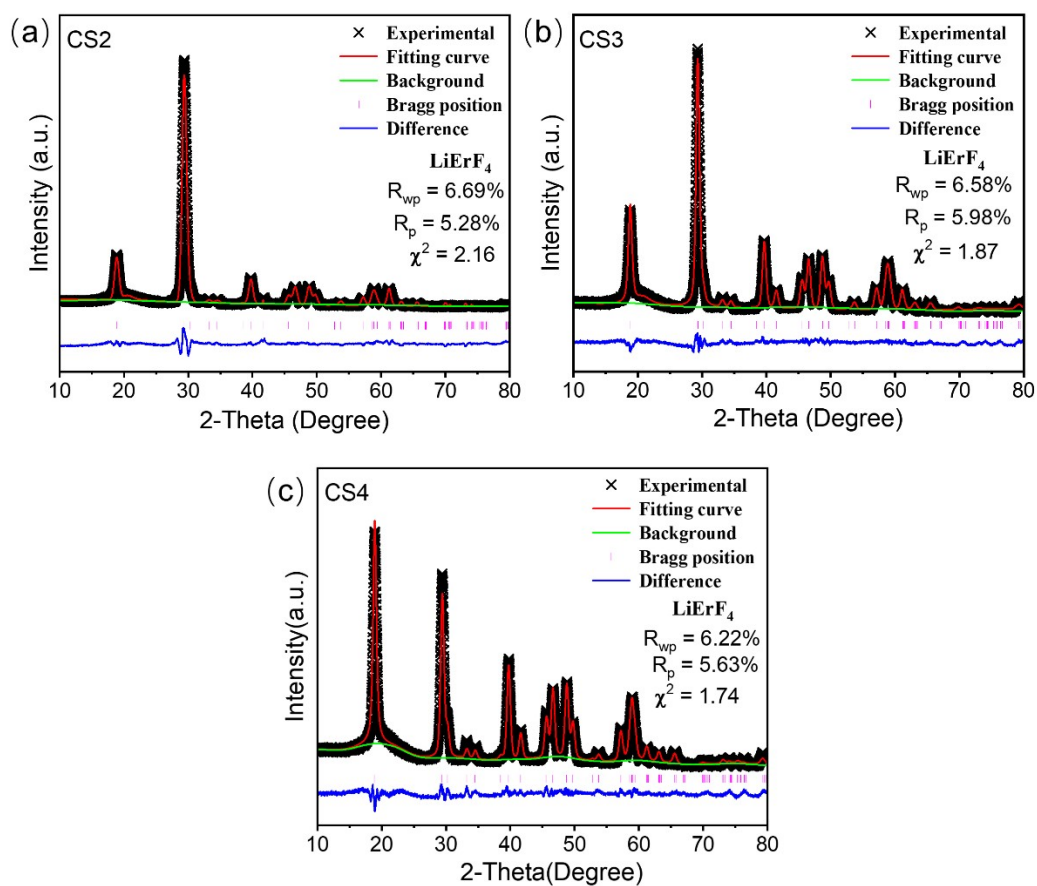

**Fig. S2** XRD refinement of LiErF<sub>4</sub>@LiYF<sub>4</sub> for concentration ratio of CS2, CS3 and

CS4.

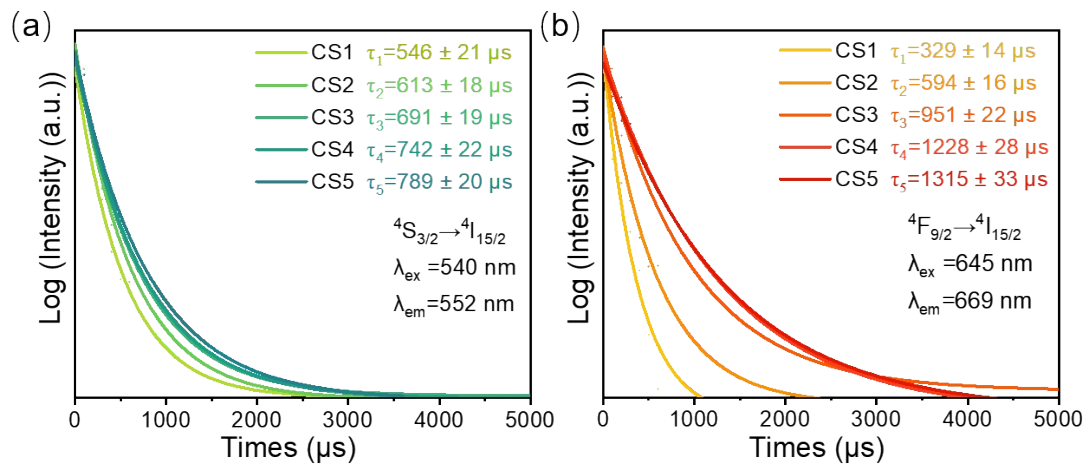

**Fig. S3** The decay curves of  $Er^{3+}$  spontaneous emission for (a) green and (b) red emitting levels of  $LiErF_4@LiYF_4$  nanoparticles

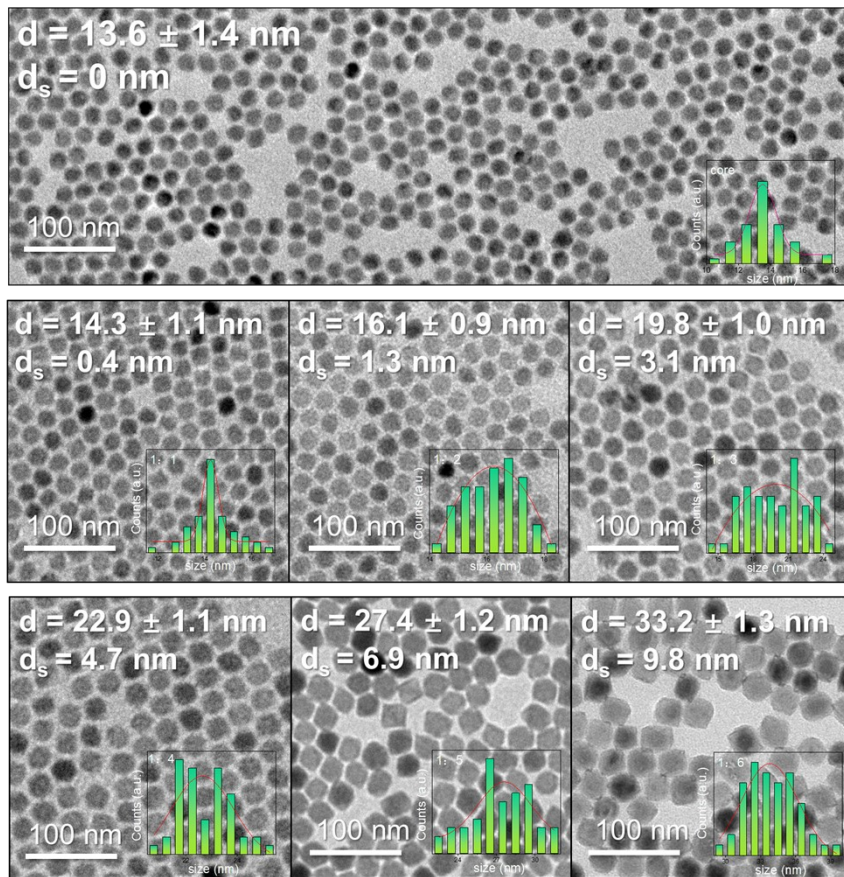

**Fig. S4** TEM images of  $\text{LiErF}_4@\text{LiYF}_4$  samples with different shell thickness, the insets show their corresponding particle size distributions.

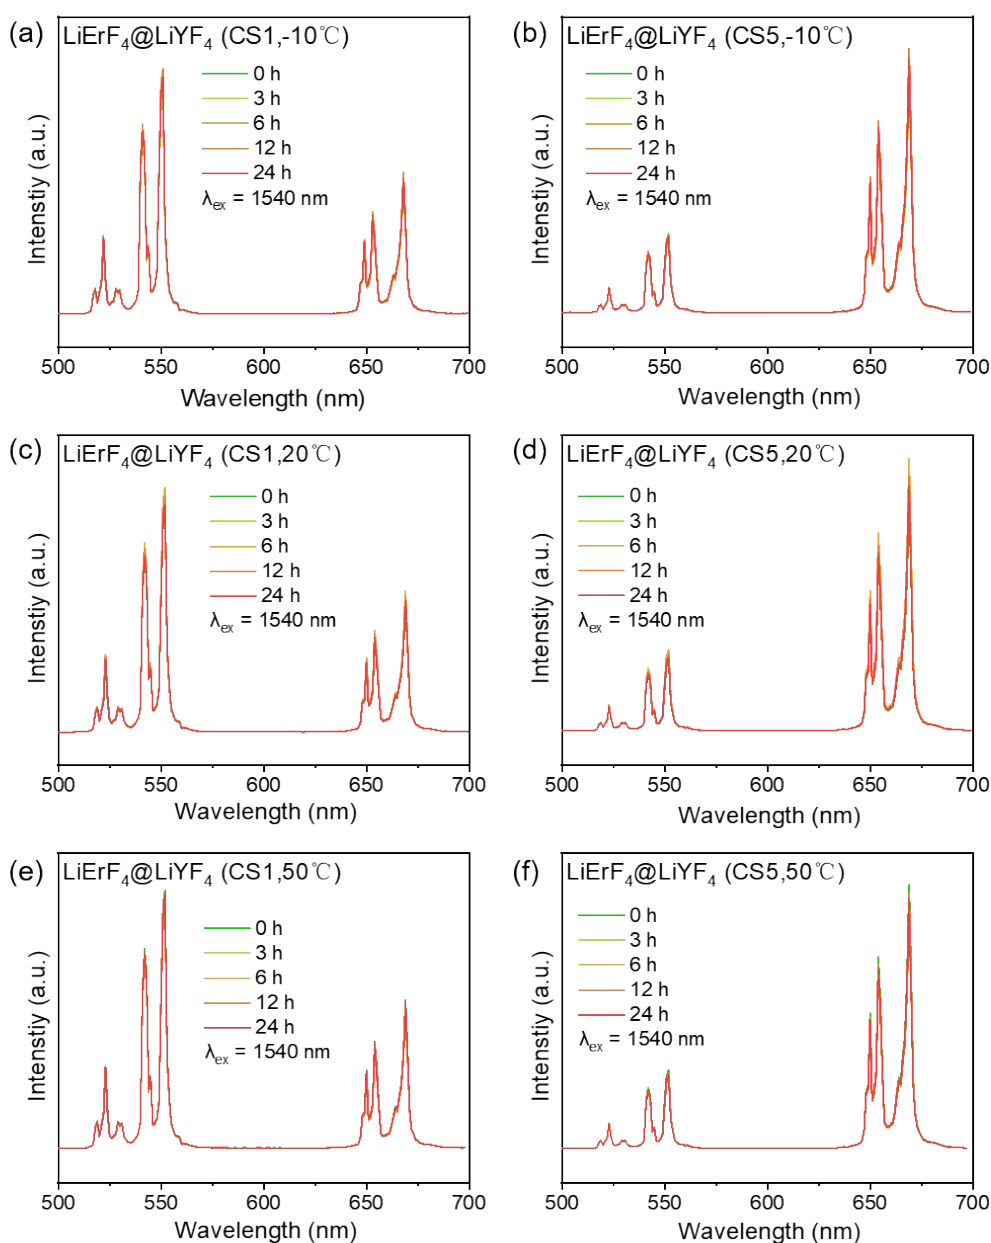

**Fig. S5** (a, b) Upconversion emission spectra of CS1 and CS5 samples were measured after storage at  $-10^\circ\text{C}$  for different time. (c, d) Upconversion emission spectra of CS1 and CS5 samples were measured after storage at  $20^\circ\text{C}$  for different time. (e, f) Upconversion emission spectra of CS1 and CS5 samples were measured after storage at  $50^\circ\text{C}$  for different time.

### 3. Tables S1-S3

**Table S1.** The calculated values of the total decay lifetime ( $\tau_G$ ), the intrinsic lifetime ( $\tau_{i-G}$ ), radiative transition rate ( $A_G$ ), spontaneous emission rate ( $A_{i-G}$ ), and the nonradiative transition rate ( $A_{r-G}$ ) of the red light of the series of samples.

| Samples | $\tau_G$<br>( $\mu s$ ) | $A_G$<br>( $\times 10^3 s^{-1}$ ) | $\tau_{i-G}$<br>( $\mu s$ ) | $A_{i-G}$<br>( $\times 10^3 s^{-1}$ ) | $A_{r-G}$<br>( $\times 10^3 s^{-1}$ ) |
|---------|-------------------------|-----------------------------------|-----------------------------|---------------------------------------|---------------------------------------|
| CS1     | 131                     | 7.63                              | 546                         | 1.83                                  | 5.80                                  |
| CS2     | 152                     | 6.57                              | 613                         | 1.63                                  | 4.94                                  |
| CS3     | 158                     | 6.32                              | 691                         | 1.44                                  | 4.88                                  |
| CS4     | 166                     | 6.02                              | 742                         | 1.35                                  | 4.67                                  |
| CS5     | 171                     | 5.85                              | 789                         | 1.26                                  | 4.59                                  |

**Table S2.** The calculated values of the total decay lifetime ( $\tau_R$ ), the intrinsic lifetime ( $\tau_{i-R}$ ), radiative transition rate ( $A_R$ ), spontaneous emission rate ( $A_{i-R}$ ), and the nonradiative transition rate ( $A_{r-R}$ ) of the red light of the series of samples.

| Samples | $\tau_R$<br>( $\mu s$ ) | $A_R$<br>( $\times 10^3 s^{-1}$ ) | $\tau_{i-R}$<br>( $\mu s$ ) | $A_{i-R}$<br>( $\times 10^3 s^{-1}$ ) | $A_{r-R}$<br>( $\times 10^3 s^{-1}$ ) |
|---------|-------------------------|-----------------------------------|-----------------------------|---------------------------------------|---------------------------------------|
| CS1     | 99                      | 10.10                             | 329                         | 3.03                                  | 7.07                                  |
| CS2     | 148                     | 6.76                              | 594                         | 1.68                                  | 5.08                                  |
| CS3     | 196                     | 5.10                              | 951                         | 1.05                                  | 4.05                                  |
| CS4     | 226                     | 4.42                              | 1228                        | 0.81                                  | 3.61                                  |
| CS5     | 235                     | 4.26                              | 1315                        | 0.76                                  | 3.50                                  |

**Table S3.** A comprehensive comparison of local-structure adjustable  $\text{LiErF}_4@\text{LiYF}_4$  with other previous reported upconversion nanomaterials

| Luminescence system                                | Modulation strategies          | Upconversion enhancement factor | Upconversion R/G ratio | Overall cost | Remark                                              | Ref.      |
|----------------------------------------------------|--------------------------------|---------------------------------|------------------------|--------------|-----------------------------------------------------|-----------|
|                                                    | Matrix                         |                                 |                        |              |                                                     |           |
| $\text{NaYF}_4$ : Yb/Er                            | component adjustment           | 2.31                            | 0.48~6.11              | Low          | Changed phase, low temperature condition            | [1]       |
| $\text{NaYF}_4$ : Yb/Er/Ga                         | Impurity ion doping            | 19                              | 1~3.75                 | Low          | No significant effect                               | [2]       |
| $\text{Na}_3\text{ScF}_6$ : Yb/Er                  | Particle size control          | 5.42                            | 0.44~15.1              | Moderation   | Long time, high temperature                         | [3]       |
| $\text{Na}(\text{Y}, \text{Gd})\text{F}_4$ : Yb/Er | Surface modification           | 1.93                            | 4.4~6.6                | High         | Complex chemical operation                          | [4]       |
| $\text{NaLuF}_4$ : Yb/Er                           | Excitation sources control     | /                               | 2.69~4.96              | Low          | Dependent on excitation power density               | [5]       |
| $\text{NaNbO}_3$ : Er/Yb                           | Magnetic field regulation      | 2.69                            | 0.24~1.33              | High         | Complex magnetic field instruments and condition    | [6]       |
| $\text{NaErF}_4@\text{NaYbF}_4@\text{NaYF}_4$      | Temperature field regulation   | 73                              | 0.9~6.6                | High         | Complex temperature field instruments and condition | [7]       |
| $\text{NaYF}_4$ :Er                                | Electric field regulation      | 2400                            | 1.02~2.12              | High         | Complex electric field instruments and condition    | [8]       |
| $\text{NaYF}_4$ : Yb/Er                            | Pressure field regulation      | 40.32                           | 2.4~6.1                | High         | Complex pressure field instruments and condition    | [9]       |
| $\text{LiErF}_4@\text{LiYF}_4$                     | Stoichiometric ratio deviation | 33.37                           | 0.53~4.55              | Low          | Simple synthesis operation                          | This work |

#### Reference :

1. Zhang Xiang-Yu, Wang Dan, Shi Huan-Wen, Wang Jin-Guo, Hou Zhao-Yang, Zhang Li-Dong, Gao Dang-Li, *Acta Phys Sin*, **2018**, 67, 084203.
2. M. Zhang, X. Zhai, P. Lei, S. Yao, X. Xu, L. Dong, K. Du, C. Li, J. Feng and H. Zhang, *J Lumin*, **2019**, 215, 116632.

3. Y. Zhang, X. Liu, M. Song and Z. Qin, *Materials*, **2023**, 16, 2247.
4. K. Bae, B. Xu, A. Das, C. Wolenski, E. Rappeport and W. Park, *RSC Adv*, **2021**, 11, 18205–18212.
5. C. Gao, Z. Song, Y. Li, Y. Han and T. Wei, *J Fluoresc*, **2022**, 32, 1679–1684.
6. Q. Xiao, Y. Zhang, H. Zhang, G. Dong, J. Han and J. Qiu, *Sci Rep*, **2016**, 6, 31327.
7. E. Wang, W. Wang, L. Niu, Y. Feng, H. Zhao, Y. Luo, L. Zhang, Q. Li, H. Chen, Y. Chang, L. Tu, H. Zhang and J. Zuo, *Adv Opt Mater*, **2023**, 12, 5, 2301827.
8. D. Ahiboz, E. Andresen, P. Manley, U. Resch-Genger, C. Würth and C. Becker, *Adv Opt Mater*, **2021**, 9, 2101285.
9. M. D. Wisser, M. Chea, Y. Lin, D. M. Wu, W. L. Mao, A. Salleo and J. A. Dionne, *Nano Letters*, **2015**, 15, 1891–1897.
